# Supplementary material
Source: bioRxiv or medRxiv preprint supplement (https://medrxiv.org/content/medrxiv/early/2020/12/11/2020.12.10.20246884.1/DC1/embed/media-1.pdf)
Supplement: Supplementary file [file media-1.pdf]

# Inclusion

Record ID (patient identifier)

---

## Hospital based surveillance of COVID-19 cases in Switzerland

### Patient-level information

**Each new record is a distinct COVID-19 Episode related to a patient.**

**In case a specific patient undergoes more than one episode, please create a new record to report each additional episode.**

Is this another COVID-19 episode from a same patient ?

- No (this is the patient's first episode)  
 Yes (the first episode record has been already reported)  
 Still to be confirmed

ID of first episode of this patient

ID is the number on the right of the full CenterID-ID identifier, e.g. 123-456

---

Center (or consortium) where the first episode was created

- CHUV (Lausanne)    EOC (Lugano)  
 HFR (Fribourg)    Hirslanden AG ZH (Zurich)    Hopital VS (Sion)  
 HUG (Geneva)    Inselspital (Bern)  
 KISPI (Basel)    KISPI (Zurich)  
 KSA (Aarau)    KSGR (Graubunden)  
 KSNW (Niedwalden)    KSSG (St.Gallen) & consortium    KSW (Winterthur)  
 LUKS (Luzern)    OKS (St.Gallen)  
 Spitaeler SH (Schaffhausen)  
 STGAG KSM (Muensterlingen)  
 USB (Basel)    USZ (Zurich)  
(your current center: [user-dag-label])

**Checking inclusion criteria**

Hospitalised for more than 24 hours  Yes  No

Laboratory-confirmed COVID-19 diagnosis  Yes  No

**Patient's inclusion**

Confirm inclusion ?  Yes (include patient)

Inclusion date

\_\_\_\_\_

ID of user checking the inclusion

\_\_\_\_\_

Current date

2020-10-29  
((last date form is saved))

# Demography

## Demography

Year of birth

\_\_\_\_\_

Is the patient 6 years old or less ?

- No
- Yes

Birth Month

\_\_\_\_\_

Gender

- Male
- Female
- Other

Height, Weight and BMI will be evaluated during each individual hospitalisation event

# Case Declaration

Starting date of COVID-19 symptoms

---

## Exposure factors

Type of exposure

- Community acquired
- Nosocomial (> 5 days)
- Unknown

Where was the patient contaminated?

- Household
- School / Kindergarten /Daycare
- Unknown

Employed in a healthcare facility ?

- No
- Yes
- Unknown

Employed in a microbiology laboratory?

- No
- Yes
- Unknown

## Sample

Date and time of lab sample collection

---

...check if date/time of sample may NOT be exact

- exact date and time
- exact date / estimated time
- estimated date and time (optional)

Type of sample

- Nasal swab
- Throat swab
- Nasopharyngeal swab
- Tracheal aspiration
- Broncho-alveolar lavage
- Other...

...please, specify sample type

---

In which service was the sample taken ?

- Medicine
- Geriatrics
- Intensive Care
- Surgery
- Paediatrics
- Emergency Room
- Other...

...please, specify where the sample was taken

---

---

Laboratory confirmation method  RT-PCR  
 Other...

---

...please, specify confirmation method

---

---

Was there another sample taken for laboratory testing?  No  
 Yes

## Second sample

Date and time of lab sample collection

---

---

...check if date/time of sample may NOT be exact  exact date and time  
 exact date / estimated time  
 estimated date and time (optional)

---

Type of sample  Nasal swab  
 Throat swab  
 Nasopharyngeal swab  
 Tracheal aspiration  
 Broncho-alveolar lavage  
 Other...

---

...please, specify sample type

---

---

In which service was the sample taken ?  Medicine  
 Geriatrics  
 Intensive Care  
 Surgery  
 Paediatrics  
 Emergency Room  
 Other...

---

...please, specify where the sample was taken

---

---

Laboratory confirmation method  RT-PCR  
 other...

---

...please, specify confirmation method

---

---

Laboratory test result  Positive  
 Negative

---

---

Was there another sample taken for laboratory testing?  No  
 Yes

**Third sample**

Date and time of lab sample collection

---

...check if date/time of sample may NOT be exact

- exact date and time  
 exact date / estimated time  
 estimated date and time (optional)

Type of sample

- Nasal swab  
 Throat swab  
 Nasopharyngeal swab  
 Tracheal aspiration  
 Broncho-alveolar lavage  
 Other...

...please, specify sample type

---

In which service was the sample taken ?

- Medicine  
 Geriatrics  
 Intensive Care  
 Surgery  
 Paediatrics  
 Emergency Room  
 Other...

...please, specify where the sample was taken

---

Laboratory confirmation method

- RT-PCR  
 Other...

...please, specify confirmation method

---

Laboratory test result

- Positive  
 Negative

Was there another sample taken for laboratory testing?

- No  
 Yes

**Fourth sample**

Date and time of lab sample collection

---

...check if date/time of sample may NOT be exact

- exact date and time  
 exact date / estimated time  
 estimated date and time (optional)

---

Type of sample

- Nasal swab
- Throat swab
- Nasopharyngeal swab
- Tracheal aspiration
- Broncho-alveolar lavage
- Other...

---

...please, specify sample type

\_\_\_\_\_

---

In which service was the sample taken ?

- Medicine
- Geriatrics
- Intensive Care
- Surgery
- Paediatrics
- Emergency Room
- Other...

---

...please, specify where the sample was taken

\_\_\_\_\_

---

Laboratory confirmation method

- RT-PCR
- Other...

---

...please, specify confirmation method

\_\_\_\_\_

---

Laboratory test result

- Positive
- Negative

# Admission

Please confirm that the patient is rehospitalised following complications of this same COVID-19 episode!

same COVID-19 episode

Entry date in the hospital

\_\_\_\_\_

## Patient's admission

Where was the patient hospitalised ?

- Medicine
- Geriatrics
- Intensive Care
- Surgery
- Paediatrics
- Emergency Room
- Other...

...please, specify where he/she has been diagnosed

\_\_\_\_\_

Was the patient hospitalised in an unit dedicated to COVID-19)

- No
- Yes
- Unknown

[Only applicable for hospital consortia]

If admission didn't occur in the main hospital of your consortium, please provide the ID of the subsidiary hospital in your consortium

- 2
- 3
- 4
- 5
- 6
- 7
- 8
- 9
- ((optional))

...code of Unit/Building

\_\_\_\_\_

((optional))

Origin (pre-hospitalisation)

- Domicile
- Long term care
- Other hospital
- Other...

...please, specify origin

\_\_\_\_\_

Was the patient in contact with a healthcare personnel prior to hospitalisation (by phone or consultation) ?

- Yes
- No
- Unknown



## Height and Weight during hospitalisation

Height

previously reported height (if applicable):  
[height][previous-instance]

\_\_\_\_\_ ([cm])

Weight

\_\_\_\_\_ ([kg])

BMI

\_\_\_\_\_ ([kg/m<sup>2</sup>])

Obesity

No  Yes  Unknown

This is only a warning message:  
the BMI calculation and obesity status do not match.  
Please check the given values.

Note that the WHO classification based on BMI is lacking subtleties, so this warning is only present to raise awareness on a possible error. It does not imply that there is indeed an error.

## Symptoms

Severity (CURB-65 score)

- Confusion (abbreviated Mental Test Score < 9)
- Urea (BUN > 19 mg/dL or 7 mmol/L)
- Respiratory rate > 30 per minute
- Blood pressure: diastolic < 60 or systolic < 90 mmHg
- Age >= 65 years
- None of the above

Severity (for children)

- Respiratory distress
- Oxygen saturation < 92%
- Evidence of severe clinical dehydration or clinical shock
- Altered conscious level
- None of the above

Total score (each choice counts for 1)

\_\_\_\_\_ (0-1 points: low risk >1 points: high risk)

Additional symptoms

- Cough
- Rhinitis
- Diarrhoea
- Fever
- None of the above

What was the highest temperature recorded?

\_\_\_\_\_ (in degrees celsius)

# Clinical Complementary Information

## Co-morbidities

Usual good health (no co-morbidities)

No  Yes

Chronic respiratory disease  No  Yes  Unknown

... please specify

Asthma  No  Yes  Unknown

Diabetes  No  Yes  Unknown

Hypertension  No  Yes  Unknown

Chronic cardiovascular disease  No  Yes  Unknown

Chronic renal disease  No  Yes  Unknown

Chronic liver disease  No  Yes  Unknown

Chronic neurological impairment  No  Yes  Unknown

Hematological pathology with immuno-suppression  No  Yes  Unknown

Oncological pathologies  No  Yes  Unknown

Rheumatological pathology with immuno-suppression  No  Yes  Unknown

Dementia  No  Yes  Unknown

Transplant (solid organs)  No  Yes  Unknown

HIV-positive  No  Yes  Unknown

Immuno-suppressive treatment  No  Yes  Unknown

Tuberculosis  No  Yes  Unknown

Others  No  Yes  Unknown

... please specify

**Other risk factors**

Pregnancy  No  Yes  Unknown

Postpartum < 4 weeks  No  Yes  Unknown  
(Women who gave birth in the 4 weeks before the COVID-19 episode)

Premature < 24 months  No  Yes  Unknown  
(Premature children aged < 24 months)

...please specify the gestational week the child was born in

\_\_\_\_\_ (Number between 0 and 38)

...please specify weight at birth

\_\_\_\_\_ (in kg)

Smoking  No  Yes  Unknown

Is the patient under an ACE inhibitor?  No  Yes  Unknown

Was the patient prescribed or treated with cardiovascular medications (during or prior to hospitalisation)?  No  Yes  Unknown

Charlson Comorbidity Index (CCI)

[mdcalc Calculator]

Charlson M, Szatrowski TP, Peterson J, Gold J. Validation of a combined comorbidity index. J Clin Epidemiol. 1994;47(11):1245-51. PMID: 7722560

**Antiviral treatment (against COVID-19)**

Prophylactic treatment (against COVID-19)  No  Yes  Unknown

Treatment of confirmed infection (against COVID-19)  No  Yes  Unknown

Name of the treatment  Chloroquin  Interferon  
 Lopinavir/Ritonavir  Remdesivir  
 Tenofovir  Ribavirin  
 Other...

...please, specify (name of treatment)

Starting date of the treatment

\_\_\_\_\_ ((if available))

---

Ending date of the treatment

\_\_\_\_\_  
((if available))

### Stay in Intermediate care

Did the patient stay in intermediate care ?

No  Yes  Unknown

### Intermediate care (first stay)

Intermediate care entry date

\_\_\_\_\_  
((if available))

Intermediate care exit date

\_\_\_\_\_  
((if available))

Non-invasive ventilation

No  Yes  Unknown

Any additional stay in intermediate care to report ?

No  Yes

### Intermediate care (second stay)

Intermediate care entry date

\_\_\_\_\_  
((if available))

Intermediate care exit date

\_\_\_\_\_  
((if available))

Non-invasive ventilation

No  Yes  Unknown

Any additional stay in intermediate care to report ?

No  Yes

### Intermediate care (third stay)

Intermediate care entry date

\_\_\_\_\_  
((if available))

Intermediate care exit date

\_\_\_\_\_  
((if available))

---

Non-invasive ventilation  No  Yes  Unknown

---

### Stay in Intensive care

Did the patient stay in intensive care ?

No  Yes  Unknown

---

### Intensive care (first stay)

Intensive care entry date

\_\_\_\_\_  
((if available))

Intensive care exit date

\_\_\_\_\_  
((if available))

---

Non-invasive ventilation  No  Yes  Unknown

---

Invasive ventilation  No  Yes  Unknown

---

Extra-Corporeal Membrane Oxygenation (ECMO)  No  Yes  Unknown

---

Any additional stay in intensive care to report ?  No  Yes

---

### Intensive care (second stay)

Intensive care entry date

\_\_\_\_\_  
((if available))

Intensive care exit date

\_\_\_\_\_  
((if available))

---

Non-invasive ventilation  No  Yes  Unknown

---

Invasive ventilation  No  Yes  Unknown

---

Extra-Corporeal Membrane Oxygenation (ECMO)  No  Yes  Unknown

---

Any additional stay in intensive care to report ?  No  Yes

**Intensive care (third stay)**

Intensive care entry date

---

  
((if available))

Intensive care exit date

---

  
((if available))

Non-invasive ventilation

 No  Yes  Unknown

Invasive ventilation

 No  Yes  Unknown

Extra-Corporeal Membrane Oxygenation (ECMO)

 No  Yes  Unknown**Complications  
(probably related to COVID-19)**

Did the patient have any complications ?

 No  Yes  Unknown

Ear/Nose/Throat (ENT) diseases

 No  Yes  Unknown

Acute Otitis Media

 No  Yes  Unknown

Respiratory diseases

 No  Yes  Unknown

Acute respiratory distress syndrome

 No  Yes  Unknown

Pneumonia

 No  Yes  Unknown...pneumonia code  
[see pneumonia classification] PN1  PN2  PN3  
 PN4  PN5  Lobar pneumonia  
 Other

...was the pneumonia associated with COVID-19?

 No  Yes  Unknown

Cardiac disease

 No  Yes  Unknown

Digestive disease

 No  Yes  Unknown

Liver disease

 No  Yes  Unknown

Renal disease

 No  Yes  Unknown

Neurological impairment

 No  Yes  Unknown

Osteo-articular disease  No  Yes  Unknown

Thrombosis/Embolism  No  Yes  Unknown

Other bacterial infections (excepted pneumonia)  No  Yes  Unknown

Other non-bacterial infections  No  Yes  Unknown

Other complications...  No  Yes

...please, specify (complications)

\_\_\_\_\_

### Antibiotic treatment (against complications)

Antibiotic treatment taken (against complications)  No  Yes  Unknown

Code of given antibiotics (main)  
[see list of AB codes]

\_\_\_\_\_  
([code required - 0 if n/a])

Code of given antibiotics (additional)

\_\_\_\_\_  
([optional])

Antifungal treatment taken (against complications)  No  Yes  Unknown

Cortico-steroids treatment taken (against complications)  No  Yes  Unknown

# Patient Follow Up

## Transfers

Was the patient transferred during hospitalisation?  Yes  No  Unknown

... the patient was transferred in

- Medicine
- Geriatrics
- Intensive Care
- Surgery
- Paediatrics
- Others...

... please specify (one item only)

\_\_\_\_\_

## Patient's destination

Deceased  Yes  No  Unknown

... death occurred

- during hospitalisation
- after being discharged

Date of death

\_\_\_\_\_

Was the death caused by COVID-19?  No  Yes  Unknown

Destination

- Domicile
- LTC Facility
- Another hospital
- Other
- Unknown

... please specify destination

\_\_\_\_\_

Was the patient transferred to an hospital participating to this surveillance system?  No  Yes



---

In which participating hospital was the patient transferred?

Make sure you give the patient ID to the hospital he/she is being transferred to in order to ease the follow-up process!

- CHUV (Lausanne)
- EOC (Lugano)
- HFR (Fribourg)
- Hirslanden AG ZH (Zurich)
- Hopital VS (Sion)
- HUG (Geneva)
- Inselspital (Bern)
- KISPI (Basel)
- KISPI (Zurich)
- KSA (Aarau)
- KSGR (Graubunden)
- KSNW (Niedwalden)
- KSSG (St.Gallen) & consortium
- KSW (Winterthur)
- LUKS (Luzern)
- OKS (St.Gallen)
- Spitaeler SH (Schaffhausen)
- STGAG KSM (Muensterlingen)
- USB (Basel)
- USZ (Zurich)

---

Why was the patient transferred to another hospital?

- Lack of space
- Favourable evolution (the patient was put in recovery care)
- Unfavourable evolution (the patient needed to be put in intensive care)
- Unknown

---

Discharging date from hospital

---

---

Did the patient leave with any sequelae requiring post-discharge treatment?

- Yes    No    Unknown

---

## Comments

Comments

---
